# Supplementary material
Source: Springer Nature journal article supplement (https://www.springermedizin.de/resource/supplementary/12916_2011_546_MOESM3_ESM.pdf/9598128)

A. In(U-Cd)

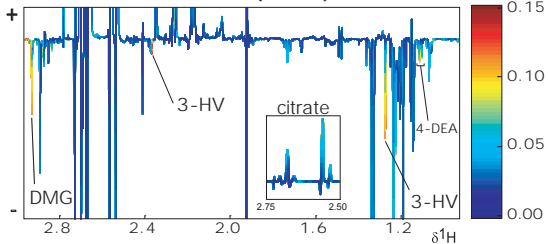

B. AGE

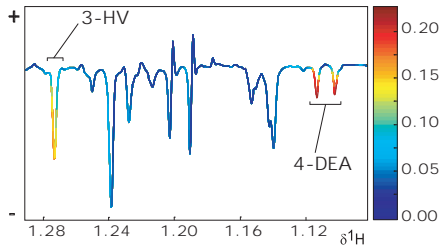C. SEX $^\alpha$ 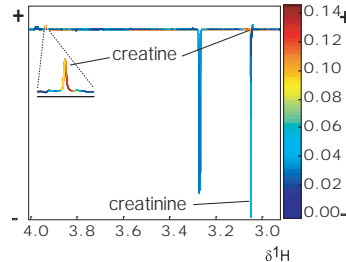

D. In(U-NAG)

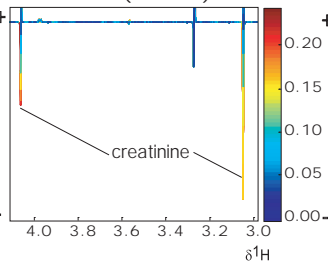E. SMOKING STATUS $^\beta$ 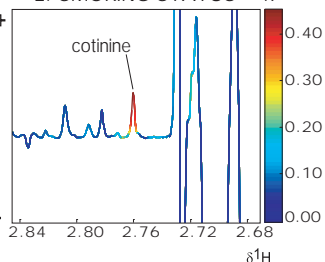

Supplement: MOESM3 [file 9598128]
